# Supplementary material for: Genetic and serologic surveillance of canine (CIV) and equine (EIV) influenza virus in Nuevo León State, México
Source: PeerJ. 2019 Dec 17;7:e8239. doi: 10.7717/peerj.8239 (PMC6924343; doi:10.7717/peerj.8239)
Supplement: Supplemental Information 1 — Supplemental information of sampled collection used in this research. [file peerj-07-8239-s001.xlsx]

## Sheet: INFLUENZA DETECTION
				RESPIRATORY SYMPTOMS									ACCESION NUMBER
	NAME	SAMPLE	MUNICIPALITY	ANOREXY	COUGH	RESPIRATORY DIFFICULTY	FEVER	CONJUNCTIVITIS	RUNNY NOSE	SNEZZING	EMESIS	TEST
1	ZIP	NASAL SWAB	GUADALUPE	PRESENT	ABSENT	PRESENT	ABSENT	PRESENT	PRESENT	ABSENT	PRESENT	CIV POSITIVE	NO DATA
2	MATEO	CONJUNTIVAL SWAB	SAN NICOLAS	ABSENT	PRESENT	ABSENT	ABSENT	PRESENT	PRESENT	ABSENT	ABSENT	CIV POSITIVE	NO DATA
3	WILLY	CONJUNTIVAL SWAB	SAN NICOLAS	PRESENT	PRESENT	PRESENT	ABSENT	PRESENT	ABSENT	PRESENT	ABSENT	CIV POSITIVE	NO DATA
4	NO NAME	CONJUNTIVAL SWAB	APODACA	ABSENT	PRESENT	PRESENT	ABSENT	PRESENT	PRESENT	PRESENT	ABSENT	CIV POSITIVE	NO DATA
5	MORETTA	CONJUNTIVAL SWAB	APODACA	ABSENT	PRESENT	PRESENT	ABSENT	PRESENT	PRESENT	PRESENT	ABSENT	CIV POSITIVE	NO DATA
6	COQUETA	NASAL SWAB	SAN NICOLAS	ABSENT	ABSENT	ABSENT	ABSENT	PRESENT	ABSENT	ABSENT	ABSENT	CIV POSITIVE	NO DATA
7	MARA	NASAL SWAB	SAN NICOLAS	ABSENT	ABSENT	ABSENT	ABSENT	PRESENT	ABSENT	PRESENT	ABSENT	CIV POSITIVE	NO DATA
8	NOE	NASAL SWAB	MONTERREY	PRESENT	PRESENT	ABSENT	ABSENT	PRESENT	PRESENT	PRESENT	ABSENT	CIV POSITIVE	NO DATA
9	JAMA	NASAL SWAB	ESCOBEDO	PRESENT	ABSENT	ABSENT	PRESENT	PRESENT	ABSENT	ABSENT	ABSENT	CIV POSITIVE	MH463600
10	GREG	NASAL SWAB	ESCOBEDO	ABSENT	ABSENT	ABSENT	ABSENT	PRESENT	PRESENT	ABSENT	ABSENT	CIV POSITIVE	MH463596
11	TONCA	NASAL SWAB	ESCOBEDO	ABSENT	ABSENT	ABSENT	ABSENT	PRESENT	ABSENT	PRESENT	ABSENT	CIV POSITIVE	NO DATA
12	LOVELY	CONJUNTIVAL SWAB	ESCOBEDO	PRESENT	ABSENT	ABSENT	PRESENT	PRESENT	PRESENT	ABSENT	ABSENT	CIV POSITIVE	MH463599
13	CAMILA	NASAL SWAB	ESCOBEDO	ABSENT	ABSENT	ABSENT	ABSENT	ABSENT	ABSENT	ABSENT	ABSENT	CIV POSITIVE	NO DATA
14	TJ	NASAL SWAB	ESCOBEDO	ABSENT	ABSENT	ABSENT	ABSENT	PRESENT	PRESENT	ABSENT	ABSENT	CIV POSITIVE	NO DATA
15	KODA	NASAL SWAB	MONTERREY	ABSENT	PRESENT	PRESENT	ABSENT	PRESENT	ABSENT	PRESENT	ABSENT	CIV POSITIVE	NO DATA
16	KIMY	LUNG NECROPSY	NO DATA	PRESENT	PRESENT	PRESENT	PRESENT	PRESENT	PRESENT	PRESENT	PRESENT	CIV POSITIVE	MH463598
17	KEYLA	LUNG NECROPSY	NO DATA	PRESENT	PRESENT	PRESENT	PRESENT	PRESENT	PRESENT	PRESENT	PRESENT	CIV POSITIVE	NO DATA
18	TYSON	LUNG NECROPSY	NO DATA	PRESENT	PRESENT	PRESENT	PRESENT	PRESENT	PRESENT	PRESENT	PRESENT	CIV POSITIVE	NO DATA
19	PALOMO	LUNG NECROPSY	NO DATA	PRESENT	PRESENT	PRESENT	PRESENT	PRESENT	PRESENT	PRESENT	PRESENT	CIV POSITIVE	NO DATA
20	LADY	LUNG NECROPSY	NO DATA	PRESENT	PRESENT	PRESENT	PRESENT	PRESENT	PRESENT	PRESENT	PRESENT	CIV POSITIVE	NO DATA
21	EQUINE 1	NASAL SWAB	MONTEMORELOS	PRESENT	PRESENT	PRESENT	PRESENT	ABSENT	PRESENT	ABSENT	ABSENT	EIV POSITIVE	MH463597
22	EQUINE 2	NASAL SWAB	CADEREYTA	ABSENT	PRESENT	ABSENT	ABSENT	ABSENT	PRESENT	ABSENT	ABSENT	EIV POSITIVE	NO DATA
23	EQUINE 3	NASAL SWAB	CADEREYTA	ABSENT	ABSENT	ABSENT	ABSENT	ABSENT	ABSENT	ABSENT	ABSENT	EIV POSITIVE	NO DATA
24	EQUINE 4	NASAL SWAB	CADEREYTA	PRESENT	ABSENT	ABSENT	ABSENT	ABSENT	PRESENT	PRESENT	ABSENT	EIV POSITIVE	NO DATA
25	EQUINE 5	NASAL SWAB	CADEREYTA	ABSENT	ABSENT	ABSENT	ABSENT	ABSENT	PRESENT	ABSENT	ABSENT	EIV POSITIVE	MH463601
26	EQUINE 6	NASAL SWAB	CADEREYTA	ABSENT	ABSENT	ABSENT	ABSENT	ABSENT	ABSENT	ABSENT	ABSENT	EIV NEGATIVE	NO DATA
27	EQUINE 7	NASAL SWAB	MONTERREY	ABSTENT	PRESENT	PRESENT	PRESENT	ABSENT	PRESENT	PRESENT	ABSENT	EIV NEGATIVE	NO DATA
28	EQUINE 8	NASAL SWAB	SAN NICOLAS	ABSENT	ABSENT	ABSENT	ABSENT	ABSENT	PRESENT	PRESENT	ABSENT	EIV POSITIVE	MH463602

## Sheet: SEROPREVALENCE DETECTION
HOST	NAME	SAMPLE	MUNICIPALITY	ANTI-M1 SEROPREVALENCE
CANINE	CANINE 1	SERUM	GUADALUPE/JUAREZ	POSITIVE
	CANINE 2	SERUM	GUADALUPE/JUAREZ	POSITIVE
	CANINE 3	SERUM	GUADALUPE/JUAREZ	POSITIVE
	CANINE 4	SERUM	GUADALUPE/JUAREZ	POSITIVE
	CANINE 5	SERUM	GUADALUPE/JUAREZ	POSITIVE
	CANINE 6	SERUM	GUADALUPE/JUAREZ	POSITIVE
	CANINE 7	SERUM	GUADALUPE/JUAREZ	POSITIVE
	CANINE 8	SERUM	GUADALUPE/JUAREZ	POSITIVE
	CANINE 9	SERUM	GUADALUPE/JUAREZ	POSITIVE
	CANINE 10	SERUM	GUADALUPE/JUAREZ	POSITIVE
	CANINE 11	SERUM	GUADALUPE/JUAREZ	POSITIVE
	CANINE 12	SERUM	GUADALUPE/JUAREZ	POSITIVE
	CANINE 13	SERUM	GUADALUPE/JUAREZ	POSITIVE
	CANINE 14	SERUM	GUADALUPE/JUAREZ	POSITIVE
	CANINE 15	SERUM	GUADALUPE/JUAREZ	POSITIVE
	CANINE 16	SERUM	GUADALUPE/JUAREZ	POSITIVE
	CANINE 17	SERUM	GUADALUPE/JUAREZ	POSITIVE
	CANINE 18	SERUM	GUADALUPE/JUAREZ	POSITIVE
	CANINE 19	SERUM	GUADALUPE/JUAREZ	POSITIVE
	CANINE 20	SERUM	GUADALUPE/JUAREZ	POSITIVE
	CANINE 21	SERUM	GUADALUPE/JUAREZ	POSITIVE
	CANINE 22	SERUM	GUADALUPE/JUAREZ	POSITIVE
	CANINE 23	SERUM	GUADALUPE/JUAREZ	POSITIVE
	CANINE 24	SERUM	GUADALUPE/JUAREZ	POSITIVE
	CANINE 25	SERUM	GUADALUPE/JUAREZ	POSITIVE
	CANINE 26	SERUM	GUADALUPE/JUAREZ	POSITIVE
	CANINE 27	SERUM	GUADALUPE/JUAREZ	POSITIVE
	CANINE 28	SERUM	GUADALUPE/JUAREZ	POSITIVE
	CANINE 29	SERUM	GUADALUPE/JUAREZ	POSITIVE
	CANINE 30	SERUM	GUADALUPE/JUAREZ	POSITIVE
	CANINE 31	SERUM	GUADALUPE/JUAREZ	POSITIVE
	CANINE 32	SERUM	GUADALUPE/JUAREZ	POSITIVE
	CANINE 33	SERUM	GUADALUPE/JUAREZ	POSITIVE
	CANINE 34	SERUM	GUADALUPE/JUAREZ	POSITIVE
	CANINE 35	SERUM	GUADALUPE/JUAREZ	POSITIVE
	CANINE 36	SERUM	GUADALUPE/JUAREZ	POSITIVE
	CANINE 37	SERUM	GUADALUPE/JUAREZ	POSITIVE
	CANINE 38	SERUM	GUADALUPE/JUAREZ	POSITIVE
	CANINE 39	SERUM	GUADALUPE/JUAREZ	POSITIVE
	CANINE 40	SERUM	GUADALUPE/JUAREZ	POSITIVE
	CANINE 41	SERUM	GUADALUPE/JUAREZ	POSITIVE
	CANINE 42	SERUM	GUADALUPE/JUAREZ	POSITIVE
	CANINE 43	SERUM	GUADALUPE/JUAREZ	POSITIVE
	CANINE 44	SERUM	GUADALUPE/JUAREZ	POSITIVE
	CANINE 45	SERUM	GUADALUPE/JUAREZ	POSITIVE
	CANINE 46	SERUM	GUADALUPE/JUAREZ	POSITIVE
	CANINE 47	SERUM	GUADALUPE/JUAREZ	POSITIVE
	CANINE 48	SERUM	GUADALUPE/JUAREZ	POSITIVE
	CANINE 49	SERUM	GUADALUPE/JUAREZ	POSITIVE
	CANINE 50	SERUM	GUADALUPE/JUAREZ	POSITIVE
	CANINE 51	SERUM	GUADALUPE/JUAREZ	POSITIVE
	CANINE 52	SERUM	GUADALUPE/JUAREZ	POSITIVE
	CANINE 53	SERUM	GUADALUPE/JUAREZ	POSITIVE
	CANINE 54	SERUM	GUADALUPE/JUAREZ	POSITIVE
	CANINE 55	SERUM	GUADALUPE/JUAREZ	POSITIVE
	CANINE 56	SERUM	GUADALUPE/JUAREZ	POSITIVE
	CANINE 57	SERUM	GUADALUPE/JUAREZ	POSITIVE
	CANINE 58	SERUM	GUADALUPE/JUAREZ	POSITIVE
	CANINE 59	SERUM	GUADALUPE/JUAREZ	POSITIVE
	CANINE 60	SERUM	GUADALUPE/JUAREZ	POSITIVE
	CANINE 61	SERUM	GUADALUPE/JUAREZ	POSITIVE
	CANINE 62	SERUM	GUADALUPE/JUAREZ	POSITIVE
	CANINE 63	SERUM	GUADALUPE/JUAREZ	POSITIVE
	CANINE 64	SERUM	GUADALUPE/JUAREZ	POSITIVE
	CANINE 65	SERUM	GUADALUPE/JUAREZ	POSITIVE
	CANINE 66	SERUM	GUADALUPE/JUAREZ	POSITIVE
	CANINE 67	SERUM	GUADALUPE/JUAREZ	POSITIVE
	CANINE 68	SERUM	GUADALUPE/JUAREZ	POSITIVE
	CANINE 69	SERUM	GUADALUPE/JUAREZ	POSITIVE
	CANINE 70	SERUM	GUADALUPE/JUAREZ	POSITIVE
	CANINE 71	SERUM	GUADALUPE/JUAREZ	POSITIVE
	CANINE 72	SERUM	GUADALUPE/JUAREZ	POSITIVE
	CANINE 73	SERUM	GUADALUPE/JUAREZ	POSITIVE
	CANINE 74	SERUM	GUADALUPE/JUAREZ	POSITIVE
	CANINE 75	SERUM	GUADALUPE/JUAREZ	POSITIVE
	CANINE 76	SERUM	GUADALUPE/JUAREZ	POSITIVE
	CANINE 77	SERUM	GUADALUPE/JUAREZ	POSITIVE
	CANINE 78	SERUM	GUADALUPE/JUAREZ	POSITIVE
	CANINE 79	SERUM	GUADALUPE/JUAREZ	POSITIVE
	CANINE 80	SERUM	GUADALUPE/JUAREZ	POSITIVE
	CANINE 81	SERUM	GUADALUPE/JUAREZ	POSITIVE
	CANINE 82	SERUM	GUADALUPE/JUAREZ	POSITIVE
	CANINE 83	SERUM	GUADALUPE/JUAREZ	POSITIVE
	CANINE 84	SERUM	GUADALUPE/JUAREZ	POSITIVE
	CANINE 85	SERUM	GUADALUPE/JUAREZ	POSITIVE
	CANINE 86	SERUM	GUADALUPE/JUAREZ	POSITIVE
	CANINE 87	SERUM	GUADALUPE/JUAREZ	POSITIVE
	CANINE 88	SERUM	GUADALUPE/JUAREZ	POSITIVE
	CANINE 89	SERUM	GUADALUPE/JUAREZ	POSITIVE
	CANINE 90	SERUM	GUADALUPE/JUAREZ	POSITIVE
	CANINE 91	SERUM	GUADALUPE/JUAREZ	POSITIVE
	CANINE 92	SERUM	GUADALUPE/JUAREZ	POSITIVE
	CANINE 93	SERUM	GUADALUPE/JUAREZ	POSITIVE
	CANINE 94	SERUM	GUADALUPE/JUAREZ	POSITIVE
	CANINE 95	SERUM	GUADALUPE/JUAREZ	POSITIVE
	CANINE 96	SERUM	GUADALUPE/JUAREZ	POSITIVE
	CANINE 97	SERUM	GUADALUPE/JUAREZ	POSITIVE
	CANINE 98	SERUM	GUADALUPE/JUAREZ	POSITIVE
	CANINE 99	SERUM	GUADALUPE/JUAREZ	POSITIVE
	CANINE 100	SERUM	GUADALUPE/JUAREZ	POSITIVE
	CANINE 101	SERUM	GUADALUPE/JUAREZ	POSITIVE
	CANINE 102	SERUM	GUADALUPE/JUAREZ	POSITIVE
	CANINE 103	SERUM	GUADALUPE/JUAREZ	POSITIVE
	CANINE 104	SERUM	GUADALUPE/JUAREZ	POSITIVE
	CANINE 105	SERUM	GUADALUPE/JUAREZ	POSITIVE
	CANINE 106	SERUM	GUADALUPE/JUAREZ	POSITIVE
	CANINE 107	SERUM	GUADALUPE/JUAREZ	POSITIVE
	CANINE 108	SERUM	GUADALUPE/JUAREZ	POSITIVE
	CANINE 109	SERUM	GUADALUPE/JUAREZ	POSITIVE
	CANINE 110	SERUM	GUADALUPE/JUAREZ	POSITIVE
	CANINE 111	SERUM	GUADALUPE/JUAREZ	POSITIVE
	CANINE 112	SERUM	GUADALUPE/JUAREZ	POSITIVE
	CANINE 113	SERUM	GUADALUPE/JUAREZ	POSITIVE
	CANINE 114	SERUM	GUADALUPE/JUAREZ	POSITIVE
	CANINE 115	SERUM	GUADALUPE/JUAREZ	POSITIVE
	CANINE 116	SERUM	GUADALUPE/JUAREZ	POSITIVE
	CANINE 117	SERUM	GUADALUPE/JUAREZ	POSITIVE
	CANINE 118	SERUM	GUADALUPE/JUAREZ	POSITIVE
	CANINE 119	SERUM	GUADALUPE/JUAREZ	POSITIVE
	CANINE 120	SERUM	GUADALUPE/JUAREZ	POSITIVE
	CANINE 121	SERUM	GUADALUPE/JUAREZ	POSITIVE
	CANINE 122	SERUM	GUADALUPE/JUAREZ	POSITIVE
	CANINE 123	SERUM	GUADALUPE/JUAREZ	POSITIVE
EQUINE	EQUINE 1	SERUM	ZUAZUA	POSITIVE
	EQUINE 2	SERUM	ZUAZUA	POSITIVE
	EQUINE 3	SERUM	ZUAZUA	POSITIVE
	EQUINE 4	SERUM	ZUAZUA	POSITIVE
	EQUINE 5	SERUM	ZUAZUA	POSITIVE
	EQUINE 6	SERUM	ZUAZUA	POSITIVE
	EQUINE 7	SERUM	ZUAZUA	POSITIVE
	EQUINE 8	SERUM	ZUAZUA	POSITIVE
	EQUINE 9	SERUM	ZUAZUA	POSITIVE
	EQUINE 10	SERUM	ZUAZUA	POSITIVE
	EQUINE 11	SERUM	ZUAZUA	POSITIVE
	EQUINE 12	SERUM	ZUAZUA	POSITIVE
	EQUINE 13	SERUM	ZUAZUA	POSITIVE
	EQUINE 14	SERUM	MONTEMORELOS	POSITIVE
	EQUINE 15	SERUM	MONTEMORELOS	POSITIVE
	EQUINE 16	SERUM	MONTEMORELOS	NEGATIVE
	EQUINE 17	SERUM	MONTEMORELOS	POSITIVE
	EQUINE 18	SERUM	MONTEMORELOS	POSITIVE
	EQUINE 19	SERUM	MONTEMORELOS	POSITIVE
	EQUINE 20	SERUM	MONTEMORELOS	POSITIVE
	EQUINE 21	SERUM	MONTEMORELOS	POSITIVE
	EQUINE 22	SERUM	MONTEMORELOS	NEGATIVE
	EQUINE 23	SERUM	MONTEMORELOS	POSITIVE
	EQUINE 24	SERUM	MONTEMORELOS	POSITIVE
	EQUINE 25	SERUM	MONTEMORELOS	POSITIVE
	EQUINE 26	SERUM	MONTEMORELOS	POSITIVE
	EQUINE 27	SERUM	SAN NICOLAS DE LOS GARZA	POSITIVE
	EQUINE 28	SERUM	SAN NICOLAS DE LOS GARZA	POSITIVE
	EQUINE 29	SERUM	SAN NICOLAS DE LOS GARZA	POSITIVE
	EQUINE 30	SERUM	SAN NICOLAS DE LOS GARZA	POSITIVE
	EQUINE 31	SERUM	SAN NICOLAS DE LOS GARZA	POSITIVE
	EQUINE 32	SERUM	SAN NICOLAS DE LOS GARZA	POSITIVE
	EQUINE 33	SERUM	SAN NICOLAS DE LOS GARZA	POSITIVE
	EQUINE 34	SERUM	SAN NICOLAS DE LOS GARZA	POSITIVE
	EQUINE 35	SERUM	SAN NICOLAS DE LOS GARZA	POSITIVE
	EQUINE 36	SERUM	SAN NICOLAS DE LOS GARZA	POSITIVE
	EQUINE 37	SERUM	SAN NICOLAS DE LOS GARZA	POSITIVE
	EQUINE 38	SERUM	SAN NICOLAS DE LOS GARZA	POSITIVE
	EQUINE 39	SERUM	SAN NICOLAS DE LOS GARZA	POSITIVE
	EQUINE 40	SERUM	SAN NICOLAS DE LOS GARZA	POSITIVE
	EQUINE 41	SERUM	SAN NICOLAS DE LOS GARZA	POSITIVE
	EQUINE 42	SERUM	SAN NICOLAS DE LOS GARZA	POSITIVE
	EQUINE 43	SERUM	SAN NICOLAS DE LOS GARZA	NEGATIVE
	EQUINE 44	SERUM	SAN NICOLAS DE LOS GARZA	POSITIVE
	EQUINE 45	SERUM	SAN NICOLAS DE LOS GARZA	POSITIVE
	EQUINE 46	SERUM	SAN NICOLAS DE LOS GARZA	POSITIVE
	EQUINE 47	SERUM	SAN NICOLAS DE LOS GARZA	POSITIVE
	EQUINE 48	SERUM	SAN NICOLAS DE LOS GARZA	POSITIVE
	EQUINE 49	SERUM	SAN NICOLAS DE LOS GARZA	POSITIVE
	EQUINE 50	SERUM	SAN NICOLAS DE LOS GARZA	POSITIVE
	EQUINE 51	SERUM	SAN NICOLAS DE LOS GARZA	POSITIVE
	EQUINE 52	SERUM	MONTERREY	POSITIVE
	EQUINE 53	SERUM	MONTERREY	POSITIVE
	EQUINE 54	SERUM	MONTERREY	POSITIVE
	EQUINE 55	SERUM	MONTERREY	POSITIVE
	EQUINE 56	SERUM	MONTERREY	POSITIVE
	EQUINE 57	SERUM	MONTERREY	POSITIVE
	EQUINE 58	SERUM	MONTERREY	POSITIVE
	EQUINE 59	SERUM	MONTERREY	POSITIVE
	EQUINE 60	SERUM	MONTERREY	POSITIVE
	EQUINE 61	SERUM	MONTERREY	POSITIVE
	EQUINE 62	SERUM	MONTERREY	POSITIVE
	EQUINE 63	SERUM	MONTERREY	POSITIVE
	EQUINE 64	SERUM	MONTERREY	POSITIVE
	EQUINE 65	SERUM	MONTERREY	POSITIVE
	EQUINE 66	SERUM	MONTERREY	POSITIVE
	EQUINE 67	SERUM	MONTERREY	POSITIVE
	EQUINE 68	SERUM	MONTERREY	POSITIVE
	EQUINE 69	SERUM	MONTERREY	POSITIVE
	EQUINE 70	SERUM	MONTERREY	POSITIVE
	EQUINE 71	SERUM	MONTERREY	POSITIVE
	EQUINE 72	SERUM	MONTERREY	POSITIVE
	EQUINE 73	SERUM	SAN NICOLAS DE LOS GARZA	POSITIVE
	EQUINE 74	SERUM	SAN NICOLAS DE LOS GARZA	POSITIVE
	EQUINE 75	SERUM	SAN NICOLAS DE LOS GARZA	POSITIVE
	EQUINE 76	SERUM	SAN NICOLAS DE LOS GARZA	POSITIVE
	EQUINE 77	SERUM	SAN NICOLAS DE LOS GARZA	POSITIVE
	EQUINE 78	SERUM	SAN NICOLAS DE LOS GARZA	NEGATIVE
	EQUINE 79	SERUM	SAN NICOLAS DE LOS GARZA	NEGATIVE
	EQUINE 80	SERUM	SAN NICOLAS DE LOS GARZA	POSITIVE
	EQUINE 81	SERUM	SAN NICOLAS DE LOS GARZA	POSITIVE
	EQUINE 82	SERUM	SAN NICOLAS DE LOS GARZA	POSITIVE
	EQUINE 83	SERUM	SAN NICOLAS DE LOS GARZA	POSITIVE
	EQUINE 84	SERUM	SAN NICOLAS DE LOS GARZA	POSITIVE
	EQUINE 85	SERUM	SAN NICOLAS DE LOS GARZA	POSITIVE
	EQUINE 86	SERUM	SAN NICOLAS DE LOS GARZA	POSITIVE
	EQUINE 87	SERUM	SAN NICOLAS DE LOS GARZA	POSITIVE
	EQUINE 88	SERUM	SAN NICOLAS DE LOS GARZA	POSITIVE
	EQUINE 89	SERUM	SAN NICOLAS DE LOS GARZA	POSITIVE
	EQUINE 90	SERUM	SAN NICOLAS DE LOS GARZA	POSITIVE
	EQUINE 91	SERUM	SAN NICOLAS DE LOS GARZA	POSITIVE
	EQUINE 92	SERUM	SAN NICOLAS DE LOS GARZA	POSITIVE
	EQUINE 93	SERUM	SAN NICOLAS DE LOS GARZA	POSITIVE
	EQUINE 94	SERUM	SAN NICOLAS DE LOS GARZA	POSITIVE
	EQUINE 95	SERUM	SAN NICOLAS DE LOS GARZA	NEGATIVE
	EQUINE 96	SERUM	SAN NICOLAS DE LOS GARZA	POSITIVE
	EQUINE 97	SERUM	SAN NICOLAS DE LOS GARZA	POSITIVE
	EQUINE 98	SERUM	SAN NICOLAS DE LOS GARZA	POSITIVE
	EQUINE 99	SERUM	SAN NICOLAS DE LOS GARZA	POSITIVE
	EQUINE 100	SERUM	SAN NICOLAS DE LOS GARZA	POSITIVE
	EQUINE 101	SERUM	SAN NICOLAS DE LOS GARZA	POSITIVE
	EQUINE 102	SERUM	MONTEMORELOS	POSITIVE
	EQUINE 103	SERUM	MONTEMORELOS	POSITIVE
	EQUINE 104	SERUM	MONTEMORELOS	POSITIVE
	EQUINE 105	SERUM	MONTEMORELOS	POSITIVE
	EQUINE 106	SERUM	MONTEMORELOS	POSITIVE
	EQUINE 107	SERUM	MONTEMORELOS	POSITIVE
	EQUINE 108	SERUM	MONTEMORELOS	NEGATIVE
	EQUINE 109	SERUM	MONTEMORELOS	NEGATIVE
	EQUINE 110	SERUM	MONTEMORELOS	POSITIVE
	EQUINE 111	SERUM	MONTEMORELOS	POSITIVE
	EQUINE 112	SERUM	MONTEMORELOS	POSITIVE
	EQUINE 113	SERUM	MONTEMORELOS	POSITIVE
	EQUINE 114	SERUM	MONTEMORELOS	POSITIVE
	EQUINE 115	SERUM	MONTEMORELOS	POSITIVE
	EQUINE 116	SERUM	ESCOBEDO	POSITIVE
	EQUINE 117	SERUM	ESCOBEDO	POSITIVE
	EQUINE 118	SERUM	ESCOBEDO	POSITIVE
	EQUINE 119	SERUM	ESCOBEDO	NEGATIVE
	EQUINE 120	SERUM	ESCOBEDO	POSITIVE
	EQUINE 121	SERUM	ESCOBEDO	POSITIVE
	EQUINE 122	SERUM	APODACA	POSITIVE
	EQUINE 123	SERUM	APODACA	POSITIVE

## Sheet: SEQUENCES PHYLOGEN
SEQUENCES SELECTED FOR PHYLOGENETIC ANALYSIS
ZOONOTIC REASSORTANTS	ACCESION NUMBER	YEAR	SUBTYPE	HOST	COUNTRY
	MK690088	2019	H3N2	CAT	USA
	CY050848	2009	H1N1	HUMAN	MEXICO
	CY053648	2009	H1N1	SWINE	MEXICO
	MG254077	2013	H1N1	CANINE	CHINA
	GU471689	2009	H1N1	CAT	USA
CONTEMPORARY ISOLATES
	AY737298	2005	H5N1	POULTRY	CHINA
	HQ237603	2009	H3N8	CANINE	USA
	MF173290	2015	H3N2	CANINE	USA
	MH363692	2017	H3N2	CANINE	USA
	MK690096	2018	H3N8	EQUINE	USA
ANCENSTRAL STRAINS OF CIV AND EIV
	CY109269	2006	H6N1	AVIAN	CHINA
	GU433346	2006	H3N2	CANINE	CHINA
	DQ124160	2003	H3N8	CANINE	USA
	CY067361	2006	H3N8	CANINE	USA
	DQ222916	2005	H3N8	EQUINE	USA
	CY028837	2008	H3N8	EQUINE	USA
ROOT OF TREE
	CY125948	2010	H18N11	BAT	PERU
	KR077935	2011	H18N11	BAT	BOLIVIA
